# Supplementary material
Source: HighWire-hosted journal article supplement (https://rmdopen.bmj.com/content/3/2/e000442)

**Supplementary File**

As requested by the reviewer we have added in the Supplementary file the forest plots for the different OA localizations.

Knee OA:

*
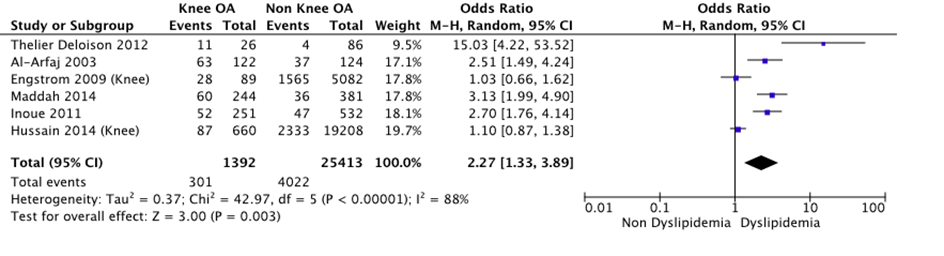
*

Hip OA:

*
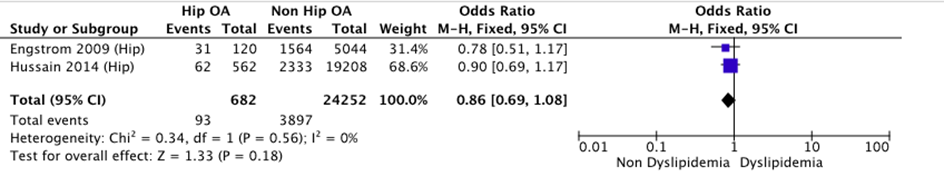
*

Hand OA:

*
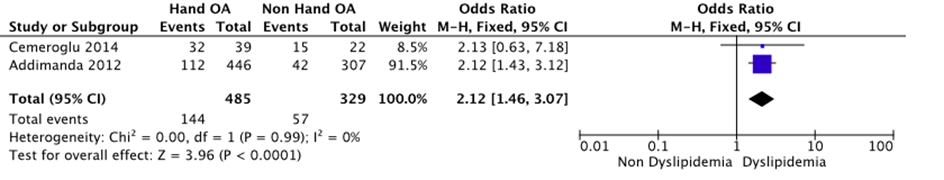
*

As requested by the reviewer we have added in the Supplementary file the funnel plot.


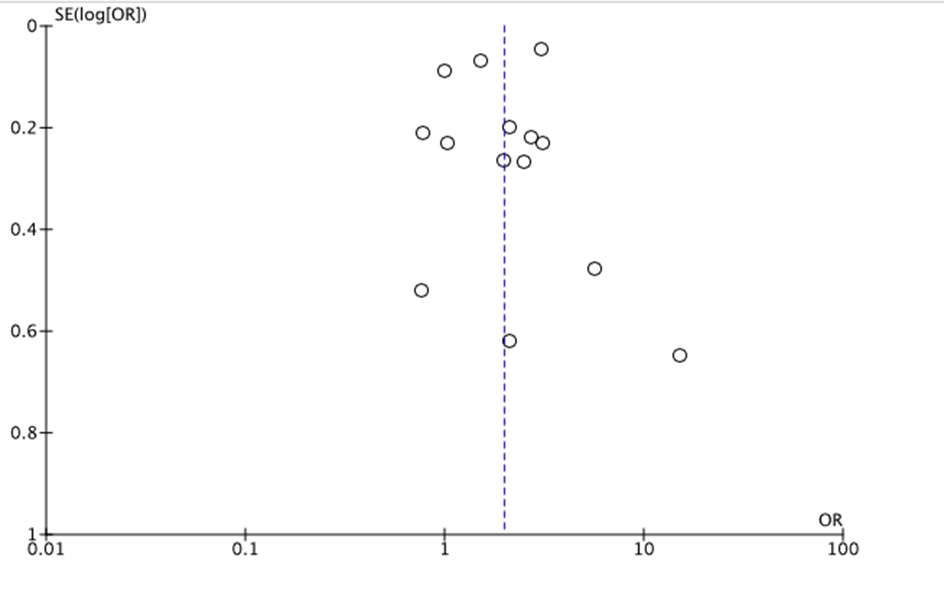

Supplement: inline-supplementary-material-1 [file inline-supplementary-material-1.docx]
